# Supplementary material for: Experimental infection with equine herpesvirus type 1 (EHV-1) induces chorioretinal lesions
Source: PubMed Central journal article supplement (PMC4028784; doi:10.1186/1297-9716-44-118), 2013-12-05

a.

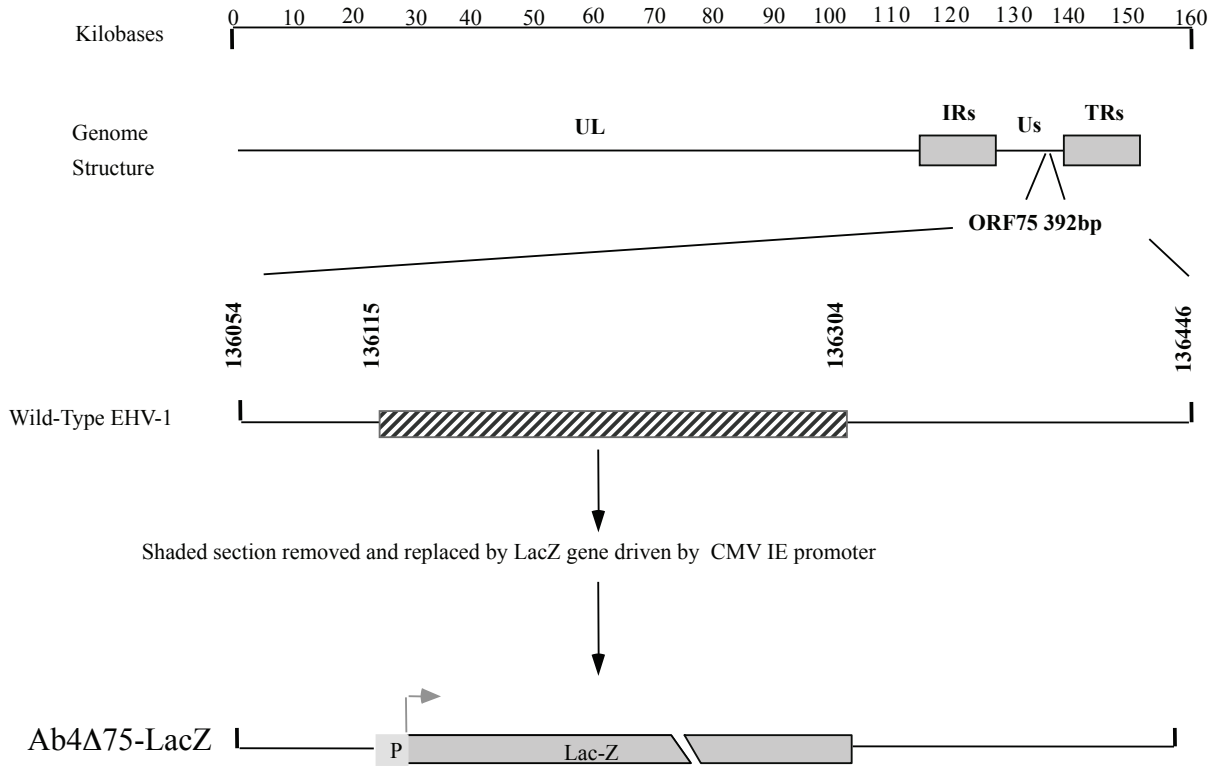

b.

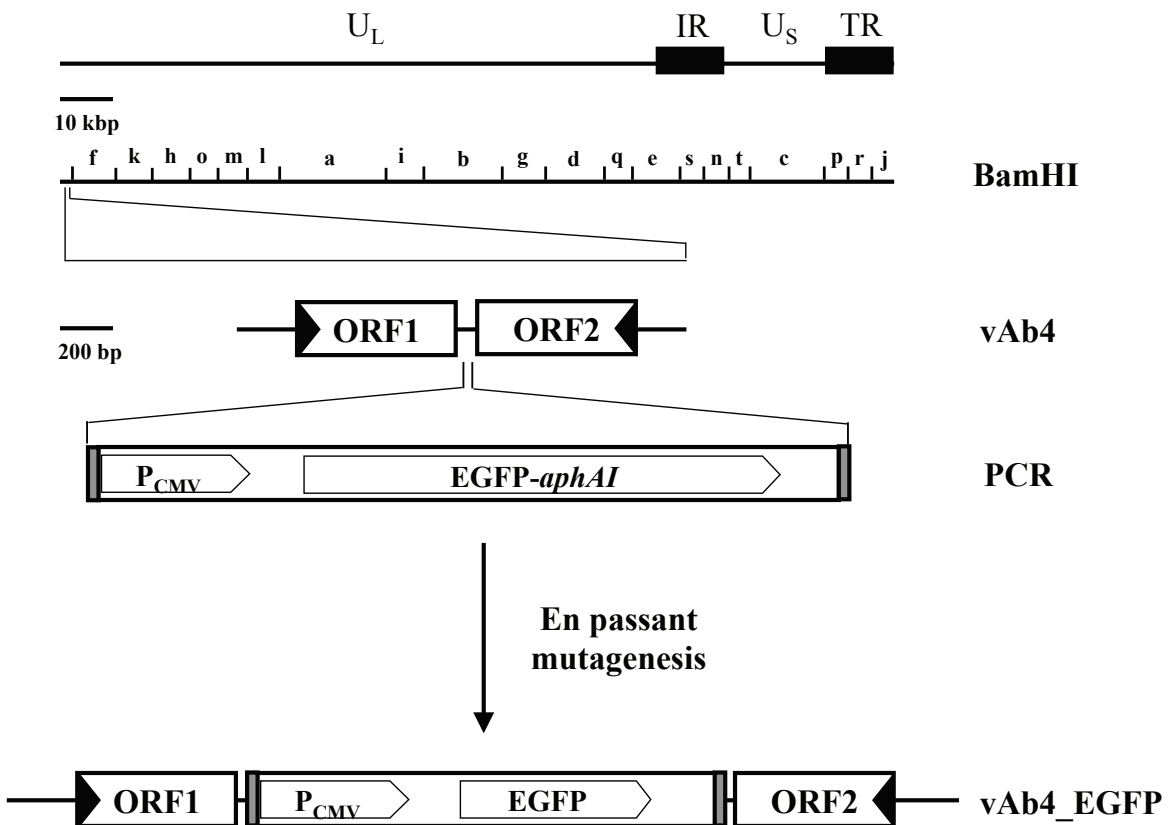

Supplement: 1297-9716-44-118-S1.pdf [file 1297-9716-44-118-S1.pdf]
